# Supplementary material
Source: Springer Nature journal article supplement (https://www.springermedizin.de/resource/supplementary/13229_2013_87_MOESM5_ESM.pdf/9676130)

Variance explained by each chromosome (%)

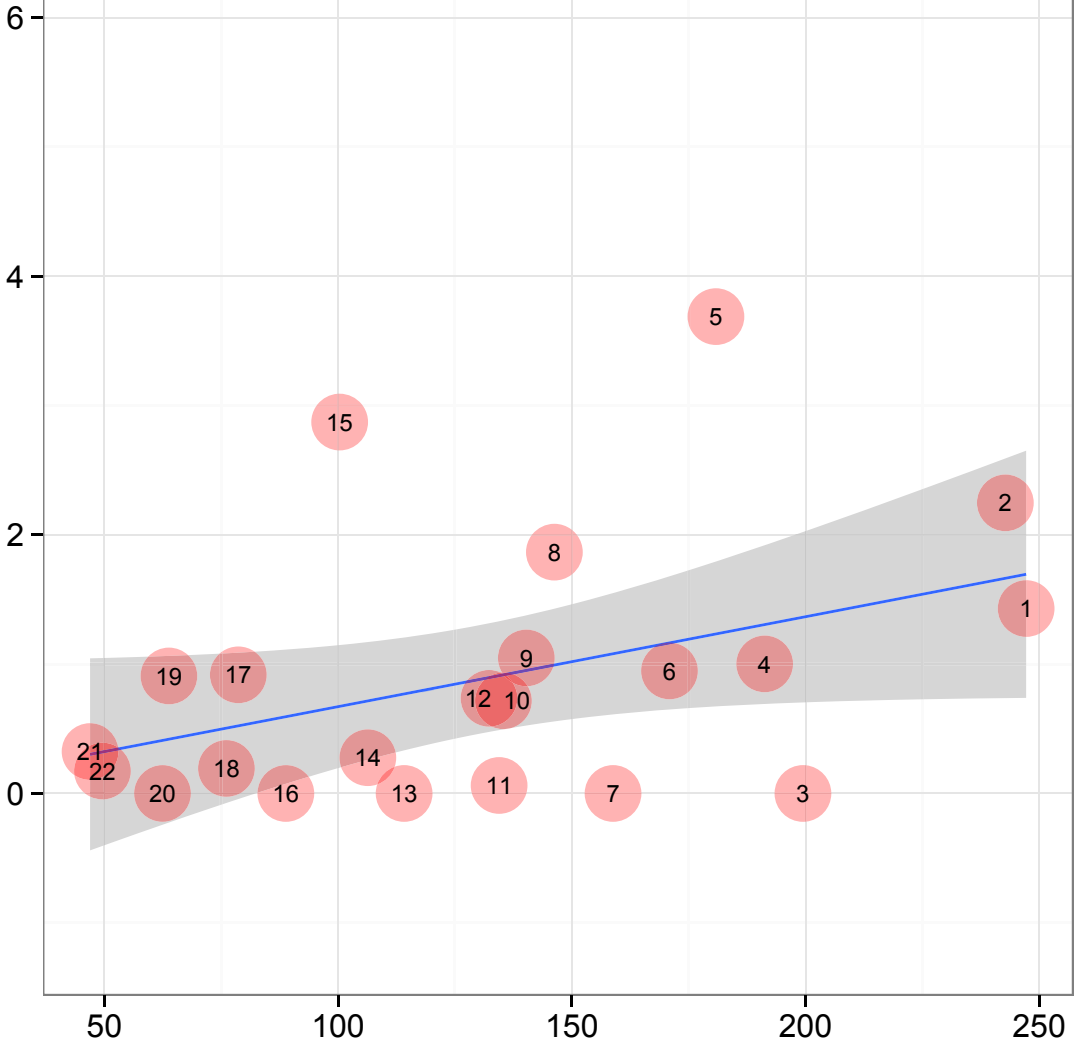

Chromosome length (Mb)

Supplement: MOESM5 [file 9676130]
